# Supplementary material for: Barrier to Gene Flow of Grey Mangrove Avicennia marina Populations in the Malay Peninsula as Revealed From Nuclear Microsatellites and Chloroplast Haplotypes
Source: Frontiers journal article supplement (doi:10.3389/fcosc.2021.727819), 2021-09-23

## Supplementary Tables and Figures

**Supplementary Figure 1.** Map of Peninsular Malaysia showing the sampling sites and individual position of transects. *A. marina* sites were located on the West coast and represented by W1, W2-A, W2-B, W3, W4, W5 and SW. Whereas, introgressive *A. marina* (with cpDNA capture of *A. alba*) sites were located on the East coast and designated by E1-A, E1-B, E2-A, E2-B, E3-A and E3-B. ©Google Earth.

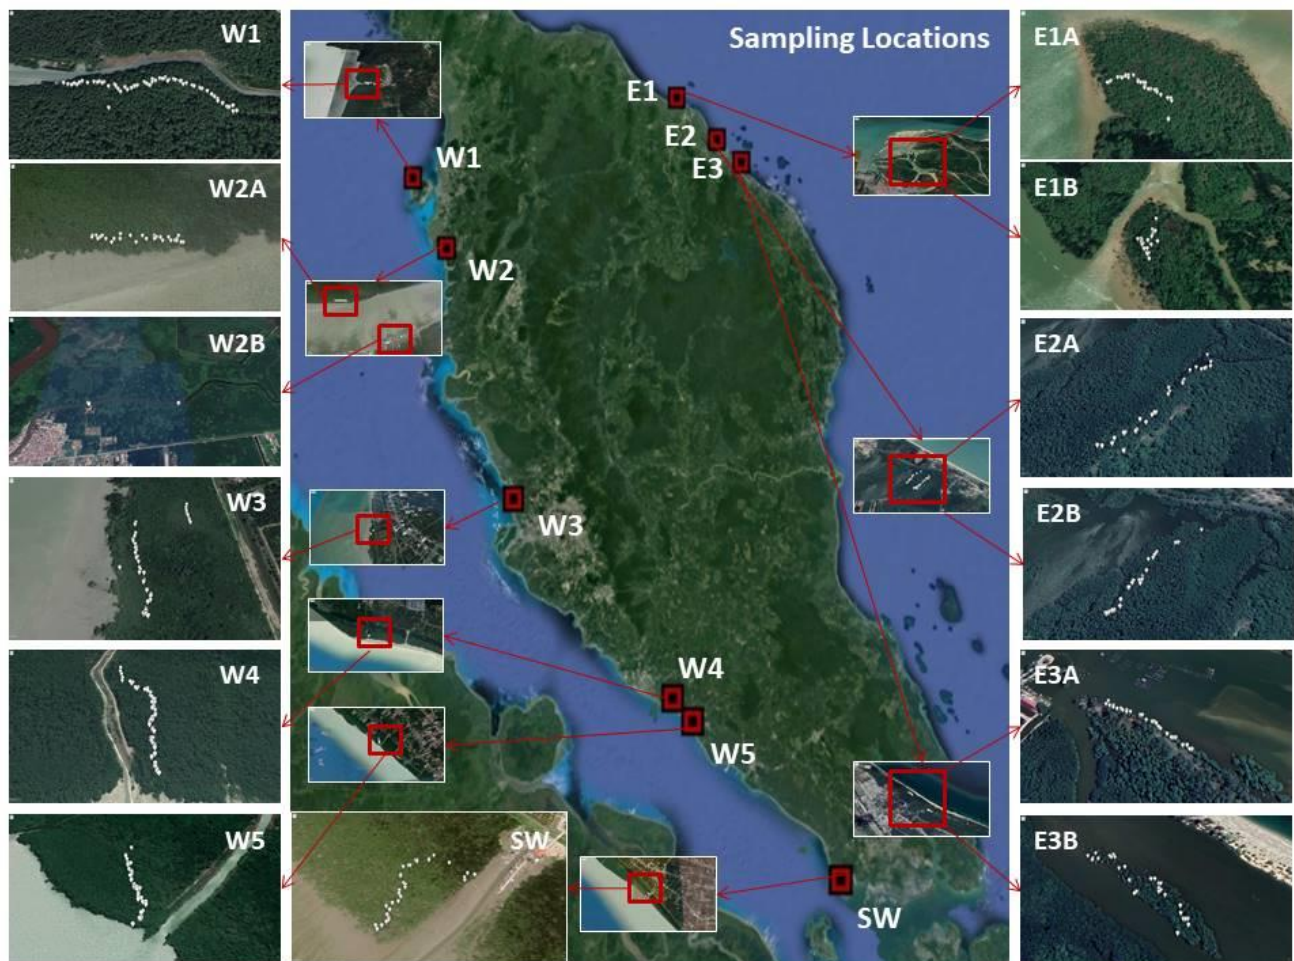

Supplement: Image_1.pdf [file Image_1.pdf]
