# Supplementary material for: Barrier to Gene Flow of Grey Mangrove Avicennia marina Populations in the Malay Peninsula as Revealed From Nuclear Microsatellites and Chloroplast Haplotypes
Source: Frontiers journal article supplement (doi:10.3389/fcosc.2021.727819), 2021-09-23

### Supplementary Tables and Figures

**Supplementary Figure 3.** Kinship ( $F_{II}$ ) values of first distance class of each populations of (A): *A. marina* on West Coast and (B): introgressive *A. marina* on East Coast of Peninsular Malaysia in relation to distance of transect from open sea.

(A)

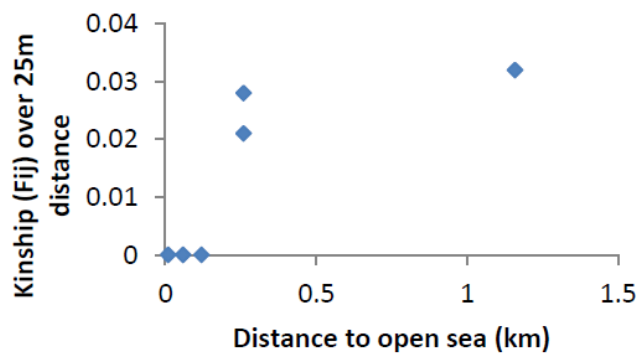

(B)

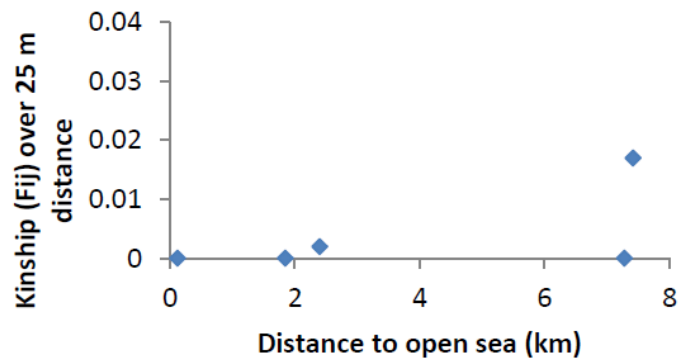

Supplement: Image_3.pdf [file Image_3.pdf]
