# Supplementary material for: Barrier to Gene Flow of Grey Mangrove Avicennia marina Populations in the Malay Peninsula as Revealed From Nuclear Microsatellites and Chloroplast Haplotypes
Source: Frontiers journal article supplement (doi:10.3389/fcosc.2021.727819), 2021-09-23
Supplement: Table_1.DOCX [file Table_1.DOCX]

**
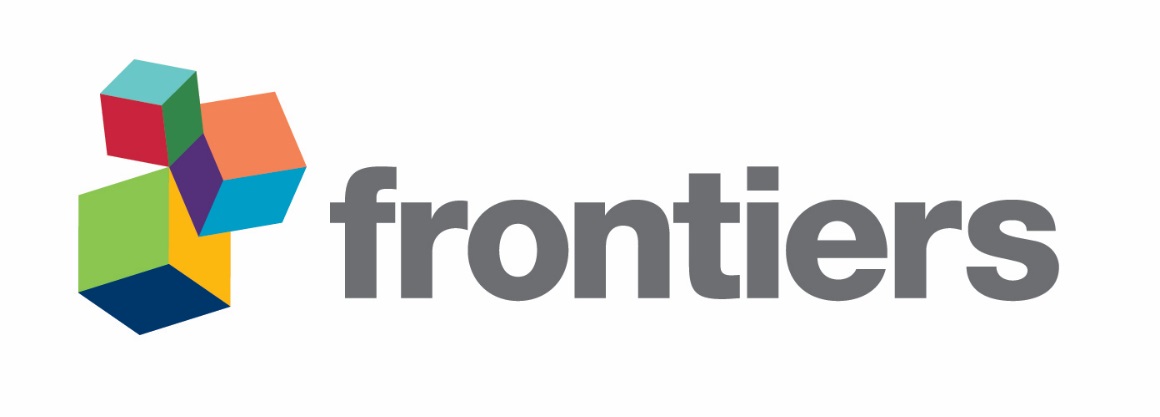
**

**Supplementary Tables and Figures**

**Supplementary Table 1.** Properties of thirteen microsatellites loci over all populations. *A*, total number of alleles; *H*O, observed proportion of heterozygotes; *H*E, expected proportion of heterozygotes.

| **Locus** | **Primer sequence (5 - 3')** | **Fluorescent label** | **Repeat motif** | **Size range (bp)** | **A** | **Ho**  **(mean ± SE)** | **He**  **(mean + SE)** | **GenBank accession no.** |
| --- | --- | --- | --- | --- | --- | --- | --- | --- |
| Avma14a | F: ACACACACACACTCTCTCTCTC  R: CAATTTTCAGAAAATTGAGGGCGC | 6-FAM | (GA)12(GT)6 | 100 - 108 | 5 | 0.020 ± 0.008 | 0.121 ± 0.056 | EF462481 |
| AMK6d | F: CCCCTGTAGCTTCTGATTTAG  R: GACCAAGACTCGTTAAATTCC | 6-FAM | (GA)12 | 120 - 141 | 11 | 0.450 ± 0.090 | 0.360 ± 0.067 | MT713342 |
| Avma8a | F: TCTCTCTCTCTCTCACACAC  R: GGGCGAGGAGATGGGAAATTA | 6-FAM | (TC)6(AC)7(AG)2 | 169 - 175 | 4 | 0.190 ± 0.041 | 0.222 ± 0.049 | EF462478 |
| Aa23b | F: ACTGGATGATTGGTGTTTTTTA  R: AGGTGCGTGGGTATGTTG | 6-FAM | (CT)11 | 229 - 233 | 3 | 0.138 ± 0.036 | 0.155 ± 0.042 | AY281862 |
| Aa22b | F: TCCCATTTGCATTACAGTCTG  R: CGAGCGTGTGCTAATCTTCC | 6-FAM | (CT)11 | 292 - 296 | 3 | 0.108 ± 0.044 | 0.163 ± 0.046 | AY281859 |
| Avma2a | F: TCTCTCTCTCTCACACACACAC  R: CTGTGTTGAGGTGGTTGATGAGAT | VIC | (GT)9(GA)6 | 88 – 103 | 8 | 0.326 ± 0.098 | 0.335 ± 0.83 | EF462474 |
| Avma1a | F: TCTCTCTCTCTCACACACACAC  R: CCAAAGAGTCACAGCAGAGGCACT | VIC | (GT)8(GA)6 | 128 - 140 | 5 | 0.324 ± 0.039 | 0.431 ± 0.042 | EF462475 |
| Aa67b | F: AACTCAAGAGAAGCGATGGC  R: TAAGCGAAGATCCTGATTCG | VIC | (GA)11 | 167 - 188 | 6 | 0.350 ± 0.075 | 0.357 ± 0.074 | AY281861 |
| Avma10a | F: TCTCTCTCTCTCTCACACAC  R: CACCATTATATCTAGTGGCTTGTG | NED | (GT)10(GA)6 | 72 – 78 | 4 | 0.393 ± 0.31 | 0.461 ± 0.019 | EF462480 |
| Avma16a | F: TCTCTCTCTCTCACACACACAC  R: TTTTAGGGTTGTGGACGTGGAAGG | NED | (GT)6(GA)6 | 86 – 94 | 5 | 0.154 ± 0.047 | 0.187 ± 0.050 | EF462483 |
| Avmal7a | F: TCTCTCTCTCTCTCACACAC  R: GCACTACCTGTTGATAGAGC | PET | (GT)10(GA)6 | 64 – 78 | 8 | 0.162 ± 0.059 | 0.245 ± 0.070 | EF462482 |
| Am81c | F: ATCGGATGTTGCTACTCCTG  R: CAAAGCCCCAAAAATAATCC | PET | (CA)9(CT)6 | 122 - 146 | 11 | 0.298 ± 0.090 | 0.295 ± 0.66 | *NA* |
| Am3c | F: GGTTCCTGCAAGTATGTCAACACCCTC  R: ACCTCGATTCCTCCCCGAATGC | PET | (TG)15 | 168-192 | 9 | 0.169 ± 0.059 | 0.223 ± 0.075 | *NA* |

a Geng *et al.* (2007) b Teixeira *et al.* (2003) c Maguire *et al.* (2000a) d Triest *et al.* (2020)
