# Supplementary material for: Barrier to Gene Flow of Grey Mangrove Avicennia marina Populations in the Malay Peninsula as Revealed From Nuclear Microsatellites and Chloroplast Haplotypes
Source: Frontiers journal article supplement (doi:10.3389/fcosc.2021.727819), 2021-09-23
Supplement: Table_2.DOCX [file Table_2.DOCX]

**
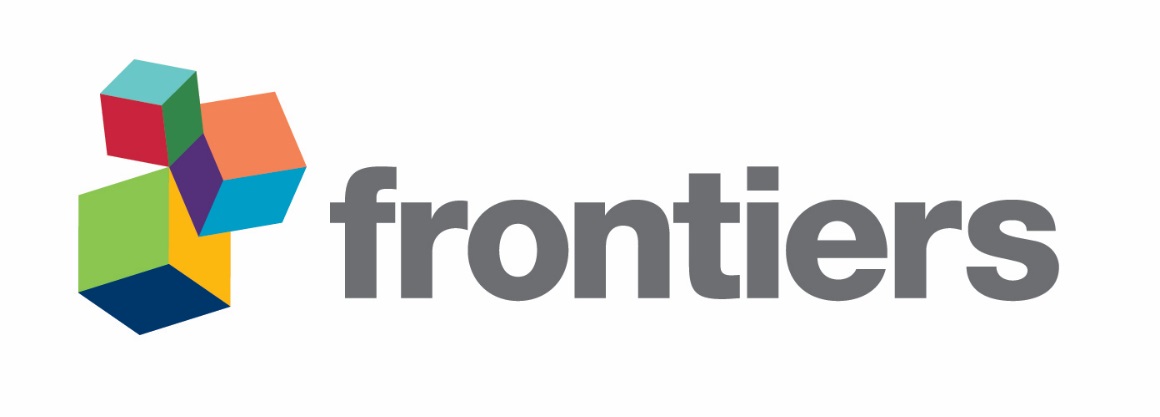
**

**Supplementary Tables and Figures**

**Supplementary Table 2.** Overview of *Avicennia* samples sequenced for the chloroplast *trnH-psbA* intron. A total of 56 samples were considered for a Maximum Likelihood Tree. Nine sequence variants (Haplo1 to Haplo9) were deposited for 12 provenances in Genbank.

| **Species** | **Country** | **Region or Province** | **Number of samples and codes from this study** | **Variant number** | **Genbank ID** | **Genbank Accession number** |
| --- | --- | --- | --- | --- | --- | --- |
| *A. marina* | Malaysia | West coast (northern part): Penang, Matang, Selangor | 13  *W1 (5x), W2 (4x), W3 (4x)* | Haplo1 | AmMPWn | MZ405086 |
| *A. marina* | Malaysia | West coast (southern part): Malacca, Parit Raja, Serhat | 10  *W4 (3x), W5 (3x), SW (4x)* | Haplo2 | AmMPWs | MZ405087 |
| *A. marina* | Bangladesh | Chittagong | 2 | Haplo3 | AmBD | MZ405088 |
| *A. marina* | Viet Nam | Cau Mau | 2 | Haplo4 | AmVN | MZ405089 |
| *A. marina* | China | Hainan | 1 | Haplo4 | AmCH | MZ405090 |
| *A. marina* | Kenya | Vanga | 1 | Haplo5 | AmKE | MZ405091 |
| *A. marina* | South Africa | Wavecrest | 1 | Haplo5 | AmSA | MZ405092 |
| Introgressed *A. marina* (cp-capture *A. alba*) | Malaysia | East coast: Kelantan, Tok Bali, Setiu | 20  E1 (7x), E2 (6x), E3 (7x) | Haplo6 | AmcapAaMPE | MZ405093 |
| *A. alba* | Viet Nam | Cau Mau | 1 | Haplo6 | AaVN | MZ405094 |
| *A. alba* | Philippines | Leyte, Ormoc | 1 | Haplo7 | AaPH | MZ405095 |
| *A. rumphiana* | Philippines | Romblon | 2 | Haplo8 | ArPH | MZ405096 |
| *A. officinalis* | Bangladesh | Chittagong | 2 | Haplo9 | AoBD | MZ405097 |
