# Supplementary material for: Barrier to Gene Flow of Grey Mangrove Avicennia marina Populations in the Malay Peninsula as Revealed From Nuclear Microsatellites and Chloroplast Haplotypes
Source: Frontiers journal article supplement (doi:10.3389/fcosc.2021.727819), 2021-09-23
Supplement: Table_3.DOCX [file Table_3.DOCX]

**
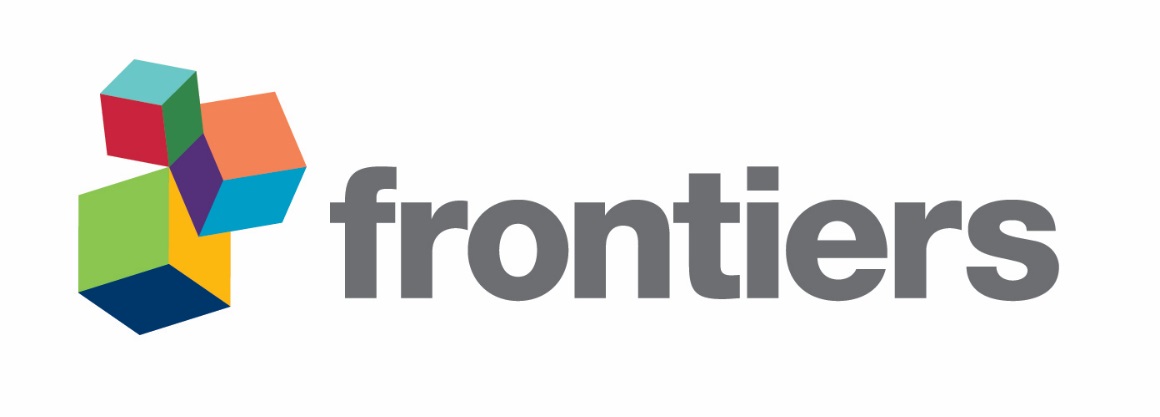
**

**Supplementary Tables and Figures**

**Supplementary Table 3.** Pairwise genetic differentiation of West coast Peninsular Malaysia populations (*A. marina*). *F*ST (below diagonal) between all pair of populations and significance (above diagonal) (ns not significant; *** p < 0.001).

|  | W1 | W2A | W2B | W3 | W4 | W5 | SW |
| --- | --- | --- | --- | --- | --- | --- | --- |
| W1 | 0.000 | *** | *** | *** | *** | *** | *** |
| W2A | 0.132 | 0.000 | ns | *** | *** | *** | *** |
| W2B | 0.120 | 0.014 | 0.000 | *** | *** | *** | *** |
| W3 | 0.192 | 0.301 | 0.301 | 0.000 | *** | *** | *** |
| W4 | 0.459 | 0.535 | 0.502 | 0.541 | 0.000 | ns | *** |
| W5 | 0.453 | 0.535 | 0.505 | 0.540 | 0.010 | 0.000 | *** |
| SW | 0.356 | 0.427 | 0.386 | 0.418 | 0.071 | 0.049 | 0.000 |
