# Supplementary material for: Barrier to Gene Flow of Grey Mangrove Avicennia marina Populations in the Malay Peninsula as Revealed From Nuclear Microsatellites and Chloroplast Haplotypes
Source: Frontiers journal article supplement (doi:10.3389/fcosc.2021.727819), 2021-09-23
Supplement: Table_4.DOCX [file Table_4.DOCX]

**
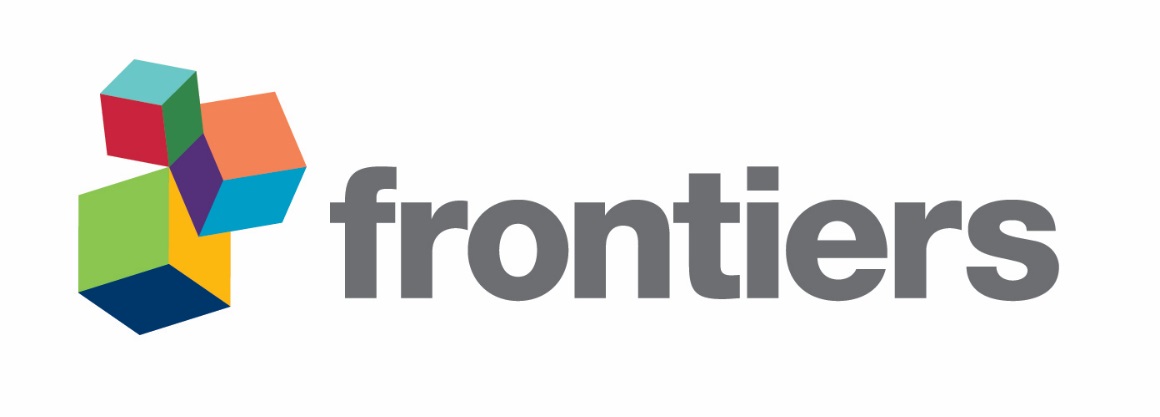
**

**Supplementary Tables and Figures**

**Supplementary Table 4:** Pairwise genetic differentiation of East coast Peninsular Malaysia populations (A. alba). FST (below diagonal) between all pair of populations and significance (above diagonal) (ns not significant; ** p < 0.01; *** p < 0.001).

|  | E3A | E3B | E2A | E2B | E1A | E1B |
| --- | --- | --- | --- | --- | --- | --- |
| E3A | 0.000 | ns | *** | *** | *** | *** |
| E3B | 0.009 | 0.000 | ** | *** | *** | *** |
| E2A | 0.062 | 0.037 | 0.000 | Ns | *** | *** |
| E2B | 0.089 | 0.055 | 0.000 | 0.000 | *** | *** |
| E1A | 0.064 | 0.085 | 0.187 | 0.207 | 0.000 | ns |
| E1B | 0.054 | 0.086 | 0.151 | 0.172 | 0.008 | 0.000 |
