# Supplementary material for: Barrier to Gene Flow of Grey Mangrove Avicennia marina Populations in the Malay Peninsula as Revealed From Nuclear Microsatellites and Chloroplast Haplotypes
Source: Frontiers journal article supplement (doi:10.3389/fcosc.2021.727819), 2021-09-23
Supplement: Table_5.DOCX [file Table_5.DOCX]

**
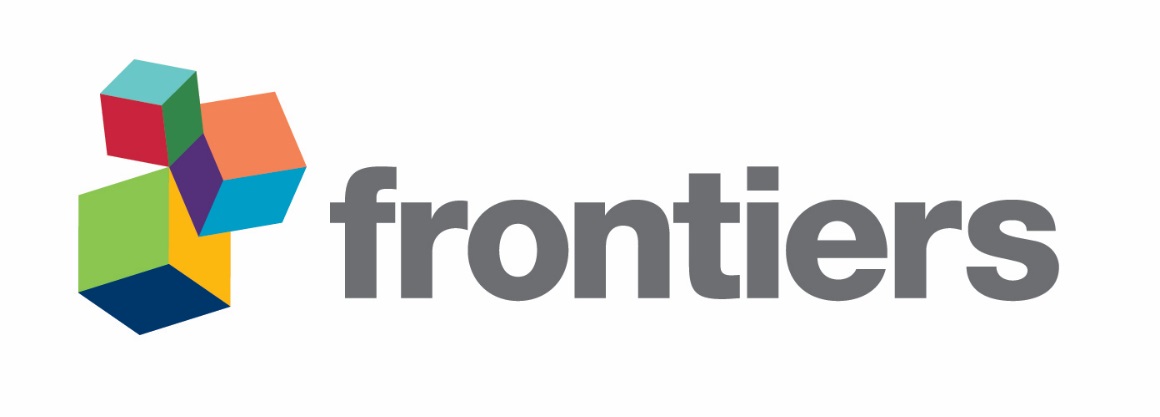
**

**Supplementary Tables and Figures**

**Supplementary Table 5:** Spatial analysis using four distance classes (km) for pairwise FST and pairwise RST (ANOVA approach). Significance level (one-sided test) within each distance class for the 7 West coast Peninsular Malaysia populations (*A. marina*) after 1000 permutation; b-lin: linear regression over full distance range; b-log: ln regression over full distance range; regressions’ significance level (one-sided test).

| Dist classes | 1 | 2 | 3 | 4 |
| --- | --- | --- | --- | --- |
| Max distance | 127 | 205 | 388 | 586 |
| Number of pairs | 5 | 5 | 5 | 6 |
| Mean distance | 59 | 184 | 345 | 484 |
| **Pairwise FST (average = 0.331)** | 0.063 | 0.363 | 0.440 | 0.438 |
| P (1-sided test. H1: obs<exp) | **0.011** | 0.647 | 0.904 | 0.910 |
| P (1-sided test. H1: obs>exp) | 0.993 | 0.356 | 0.098 | 0.091 |
| **Pairwise RST (average = 0.455)** | 0.079 | 0.458 | 0.635 | 0.617 |
| P (1-sided test. H1: obs<exp) | **0.016** | 0.525 | 0.938 | 0.915 |
| P (1-sided test. H1: obs>exp) | 0.988 | 0.479 | 0.064 | 0.086 |

| Regressions | Pairwise FST | | Pairwise RST | | |
| --- | --- | --- | --- | --- | --- |
|  | b-lin | b-log | | b-lin | b-log | |
| slope +intercept | 0.001x+0.118 | 0.090x-0.135 | | 0.001x+0.134 | 0.129x -0.210 | |
| r² | 0.47 | 0.47 | | 0.44 | 0.40 | |
| P (1-sided test. H1: obs<exp) | 0.951 | 0.991 | | 0.943 | 0.979 | |
| P (1-sided test. H1: obs>exp) | **0.050** | **0.010** | | 0.058 | **0.022** | |
